# Supplementary material
Source: MDPI journal article supplement (https://www.mdpi.com/2297-8739/9/12/406)
Supplement: s1 [file s1 › separations-2067838-supplementary.pdf]

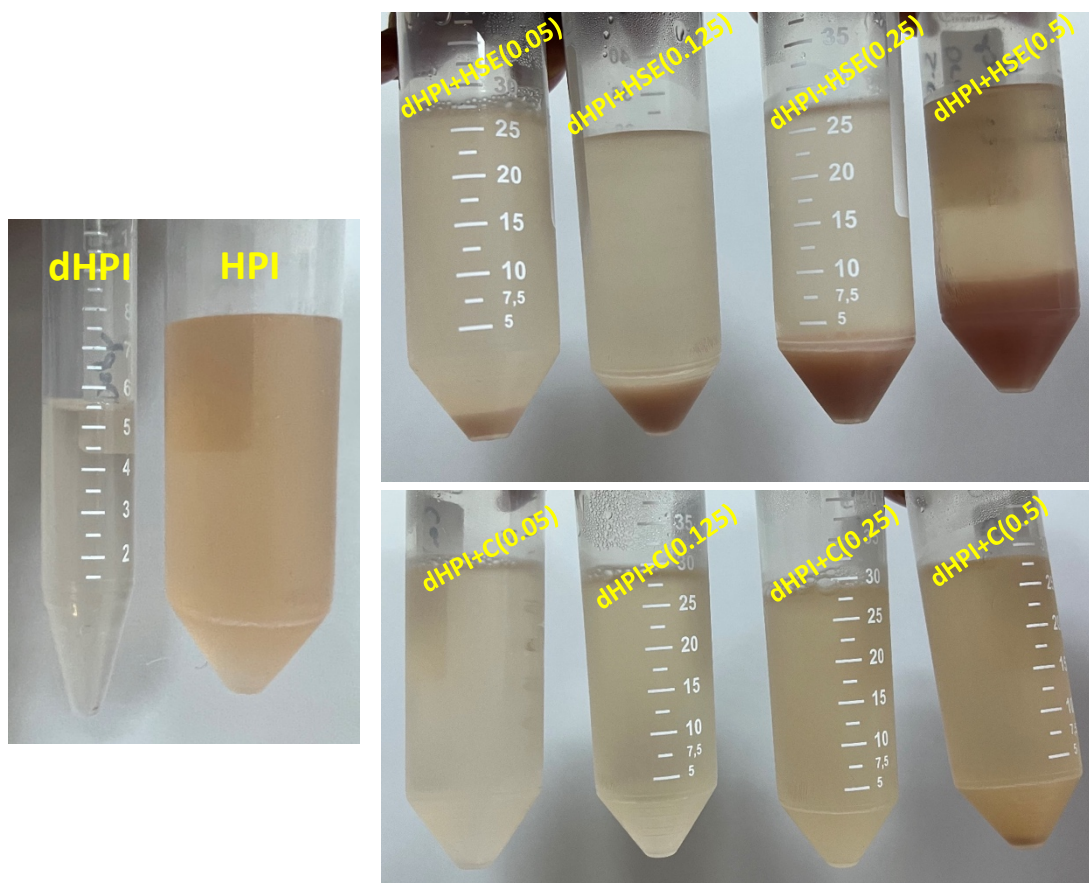

Figure S1: Visual evidence of precipitation occurrence in dHPI+HSE samples due to protein-polyphenol-protein aggregation.
